# Supplementary material for: A highly active Pd/H-ZSM-5 catalyst in lean methane combustion prepared via a sol–gel method and treated by reduction–oxidation
Source: Royal Society of Chemistry journal article supplement (doi:10.1039/d0nj00212g), 2020-01-01
Supplement: d0nj00212g1.pdf [file d0nj00212g1.pdf]

Electronic supplementary information (ESI)

**A highly active Pd/H-ZSM-5 catalyst in lean methane combustion prepared through sol-gel method and treated by reduction-oxidation**

Chao Fan,<sup>a,b</sup> Li Yang,<sup>a,b</sup> Li Luo,<sup>a,b</sup> Zhiwei Wu,<sup>\*,a</sup> Zhangfeng Qin,<sup>\*,a</sup> Huaqing Zhu,<sup>a</sup> Weibin Fan,<sup>a</sup> Jianguo Wang<sup>\*,a,b</sup>

<sup>a</sup> *State Key Laboratory of Coal Conversion, Institute of Coal Chemistry, Chinese Academy of Sciences, P.O. Box 165, Taiyuan, Shanxi 030001, PR China*

<sup>b</sup> *University of the Chinese Academy of Sciences, Beijing 100049, PR China*

<sup>\*</sup> *Corresponding authors. Tel.: +86-351-4046092; Fax: +86-351-4041153. E-mail address: qzhf@sxicc.ac.cn (Z. Qin); wuzhiwei@sxicc.ac.cn (Z. Wu); iccjgw@sxicc.ac.cn (J. Wang)*

As the Electronic supplementary information (ESI) of the manuscript “*A highly active Pd/H-ZSM-5 catalyst in lean methane combustion prepared through sol-gel method and treated by reduction-oxidation*”, following materials are provided:

A comparison of various zeolites supported palladium catalysts in their activity for lean methane combustion; TGA profiles of the precursor Pd/H-ZSM-5 catalyst; light-off profiles for methane combustion and Pd 3d XPS spectra of the Pd/H-ZSM-5 catalysts reduced with hydrogen at different temperatures; light-off tests of methane combustion over the Pd/H-ZSM-5-R catalyst at different space velocities; repeated 10 cycle light-off tests of lean methane combustion over the Pd/H-ZSM-5-R catalyst; TGA profiles of the spent Pd/H-ZSM-5-R catalyst after the 10 cycle repeated light-off tests.

**Table S1** A comparison of various zeolites supported palladium catalysts in their activity for lean methane combustion

| Catalyst       | Loading method   | Reaction conditions                                                                           | Pd loading (wt. %) | $T_{90\%}$ (°C)                                   | Ref.      |  |
|----------------|------------------|-----------------------------------------------------------------------------------------------|--------------------|---------------------------------------------------|-----------|--|
| Pd/H-ZSM-5     | impregnation     | 2% CH <sub>4</sub> + 8% O <sub>2</sub> ;<br>GHSV = 48,000 h <sup>-1</sup>                     | 1.00               | 400                                               | [1]       |  |
| Pd/H-ZSM-5     | deposition       | 1% CH <sub>4</sub> + 20% O <sub>2</sub> ;<br>GHSV = 15,000 mL g <sup>-1</sup> h <sup>-1</sup> | 0.77               | 311                                               | [2]       |  |
| Pd-SSZ-13      | ion exchange     | 0.15% CH <sub>4</sub> + 5% O <sub>2</sub> ;<br>GHSV = 100,000 h <sup>-1</sup>                 | 1.1                | 362                                               | [3]       |  |
| Pd-ZSM-5       | ibid             | ibid                                                                                          | 1.30               | 384                                               | [3]       |  |
| Pd-H-Mordenite | ion-exchange     | 1% CH <sub>4</sub> + 99% Air;<br>GHSV = 100,000 h <sup>-1</sup>                               | 0.70               | 495                                               | [4]       |  |
| Pd-H-Y         | ibid             | ibid                                                                                          | 1.00               | 475                                               | [4]       |  |
| Pd-H-SAPO-5    | ibid             | ibid                                                                                          | 0.96               | 480                                               | [4]       |  |
| Pd/H-MCM-41    | wet impregnation | O <sub>2</sub> /CH <sub>4</sub> = 4;<br>GHSV = 15,000 mL g <sup>-1</sup> h <sup>-1</sup>      | 0.98               | 454                                               | [5]       |  |
| Pd/MCM-48      | ibid             | ibid                                                                                          | 1.05               | 483                                               | [5]       |  |
| Pd/H-ZSM-5     | sol-gel          | 1% CH <sub>4</sub> + 99% Air;<br>GHSV = 10,000 mL g <sup>-1</sup> h <sup>-1</sup>             | 0.92               | 293                                               | this work |  |
|                |                  |                                                                                               |                    | GHSV = 30,000 mL g <sup>-1</sup> h <sup>-1</sup>  | 298       |  |
|                |                  |                                                                                               |                    | GHSV = 60,000 mL g <sup>-1</sup> h <sup>-1</sup>  | 308       |  |
|                |                  |                                                                                               |                    | GHSV = 100,000 mL g <sup>-1</sup> h <sup>-1</sup> | 324       |  |

**Note:**  $T_{90\%}$  denotes the temperature for lean methane combustion at which a methane conversion of 90% can be achieved.

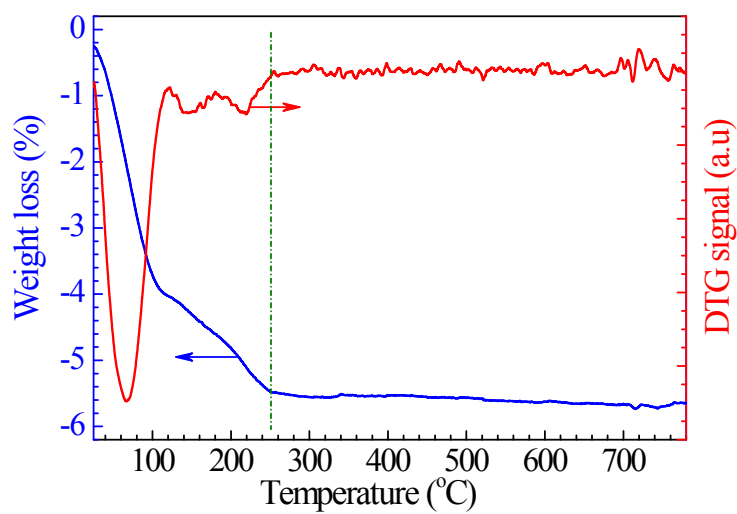

**Fig. S1** Weight loss and DTG curves for the thermogravimetric analysis of the precursor Pd/H-ZSM-5 catalyst.

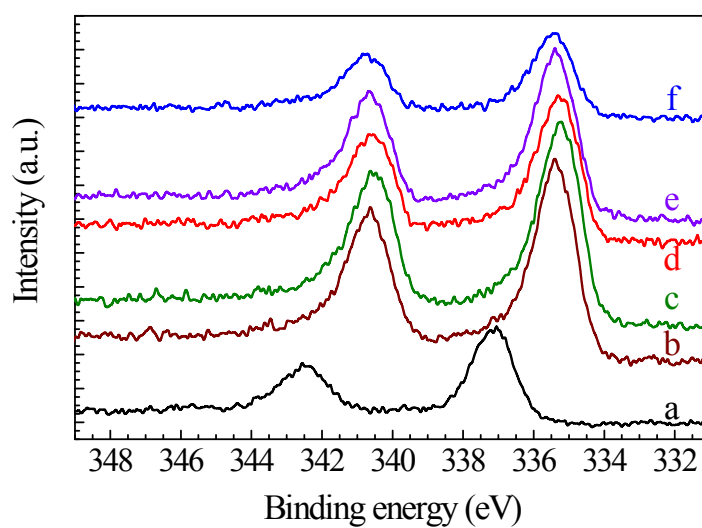

**Fig. S2** Pd 3d XPS spectra of the Pd/H-ZSM-5 catalysts subjected to reduction with hydrogen at different temperatures: (a) calcined without reduction; (b) 100 °C; (c) 200 °C; (d) 300 °C; (e) 400 °C; (f) 500 °C.

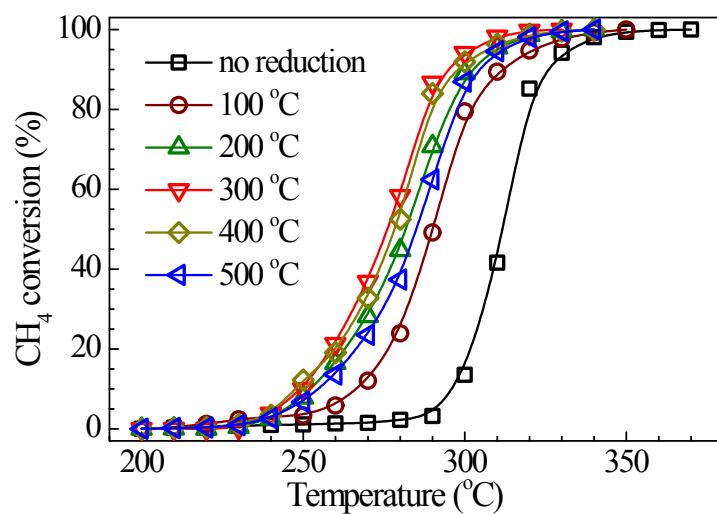

**Fig. S3** Effect of reduction temperature (marked in the legend) on the catalytic activity of Pd/H-ZSM-5 in lean methane combustion, represented by the light-off profiles (1.0 vol.% CH<sub>4</sub>, GHSV = 30,000 mL g<sup>-1</sup> h<sup>-1</sup>).

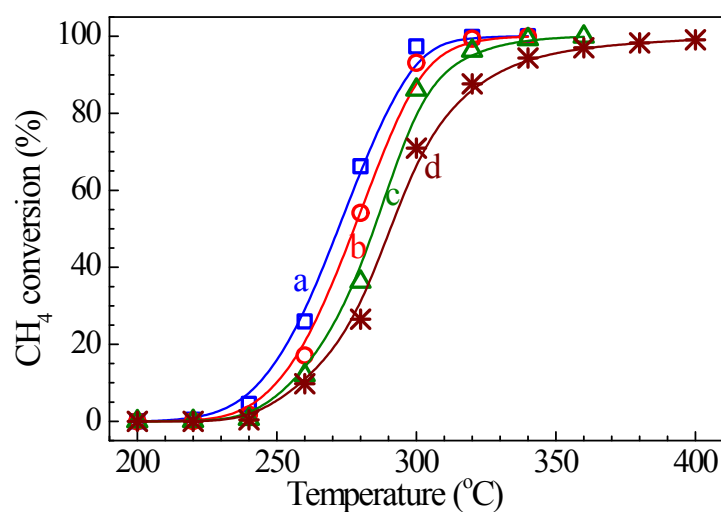

**Fig. S4** Light-off tests of lean methane combustion over the Pd/H-ZSM-5-R catalyst at different gas hourly space velocities (GHSV, mL g<sup>-1</sup> h<sup>-1</sup>): (a) 10,000; (b) 30,000; (c) 60,000; (d) 100,000.

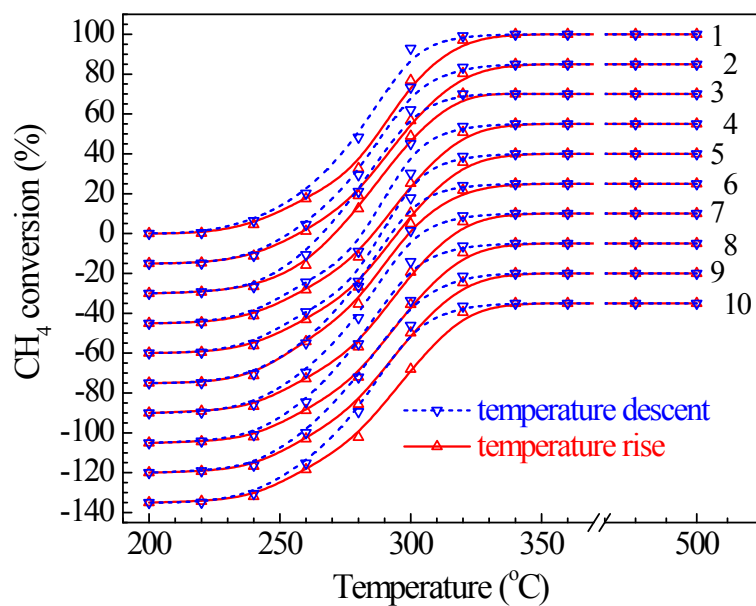

**Fig. S5** Repeated 10 cycle light-off tests of lean methane combustion over the Pd/H-ZSM-5-R catalyst (1.0 vol.% CH<sub>4</sub>, GHSV = 30,000 mL g<sup>-1</sup> h<sup>-1</sup>). From cycle 1 to cycle 10, the conversion of methane is downshifted by 15% sequentially in the graph.

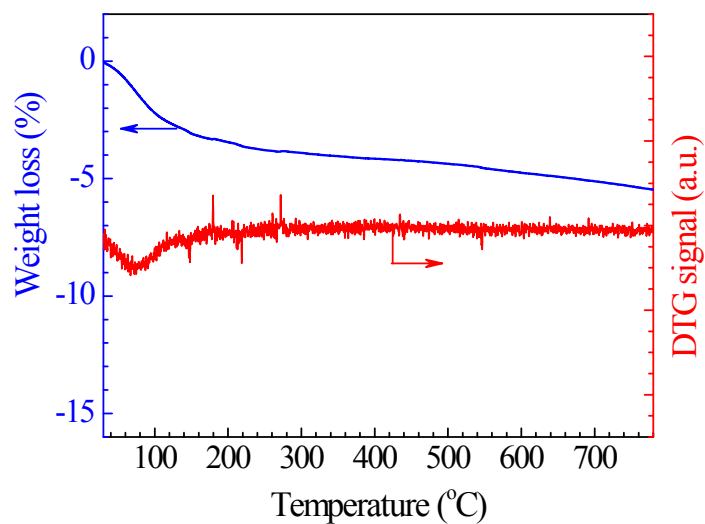

**Fig. S6** Weight loss and DTG curves for the thermogravimetric analysis of the spent Pd/H-ZSM-5-R catalyst after the 10 cycle repeated light-off tests.

## References

- (1) C. Shi, L. Yang, X. He and J. Cai, Enhanced activity and stability of Zr-promoted Pd/HZSM-5 catalyst for low-temperature methane combustion, *Chem. Commun.*, 2002, **18**, 2006–2007.
- (2) Y. Lou, J. Ma, W. Hu and G. Lu, Low-Temperature Methane Combustion over Pd/H-ZSM-5: Active Pd Sites with Specific Electronic Properties Modulated by Acidic Sites of H-ZSM-5, *ACS Catal.*, 2016, **6**, 8127–8139.
- (3) J. B. Lim, D. Jo and S. B. Hong, Palladium-exchanged small-pore zeolites with different cage systems as methane combustion catalysts, *Appl. Catal. B*, 2017, **219**, 155–162.
- (4) T. Yusaku, I. Tatsumi, N. Hiroyasu and S. Hideaki, Palladium ion-exchanged SAPO-5 for a low temperature combustion of CH<sub>4</sub>, *Stud. Surf. Sci. Catal.*, 1997, **105**, 1647–1654.
- (5) J. A. C. Ruiz, E. C. Oliveira, M. A. Fraga and H. O. Pastore, Performance of Pd supported on mesoporous molecular sieves on methane combustion, *Catal. Commun.*, 2012, **25**, 1–6.
